# Supplementary material for: Synthesis of sulphur-modified bifunctional hydrotalcites and study of their surface characteristics by inverse gas chromatography
Source: Royal Society of Chemistry journal article supplement (doi:10.1039/c5cy00765h), 2015-01-01
Supplement: c5cy00765h1.pdf [file c5cy00765h1.pdf]

## Electronic Supplementary Information (ESI)

### Synthesis of sulphur-modified bifunctional hydrotalcites and study of their surface characteristics by inverse gas chromatography

Xiaoqian Ren,<sup>\*a</sup> Xi Hu,<sup>a</sup> Feng Zhang,<sup>a</sup> Junge Wang,<sup>a</sup> Jinhua Liang,<sup>b</sup> Wenliang Wu,<sup>a</sup> Min Jiang<sup>b</sup> and Jun Wang<sup>a</sup>

<sup>a</sup>College of Chemistry and Chemical Engineering, <sup>b</sup>College of Biotechnology and Pharmaceutical Engineering, Nanjing Tech University, Jiangsu, 210009 Nanjing, China.

Tel: +8613951645412; E-mail: [xqren@njtech.edu.cn](mailto:xqren@njtech.edu.cn) (Dr. R. Xiaoqian)

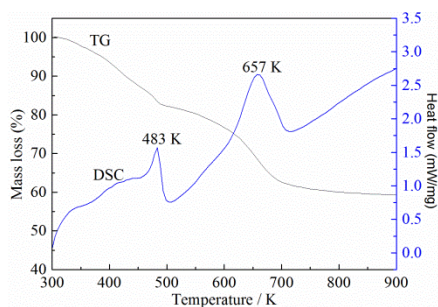

Fig.S1 The TG-DSC analysis of S/LDH-823 catalyst

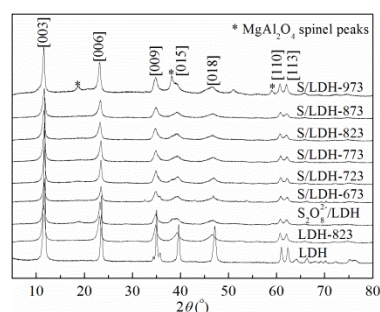

Fig.S2 The XRD patterns of the seven samples

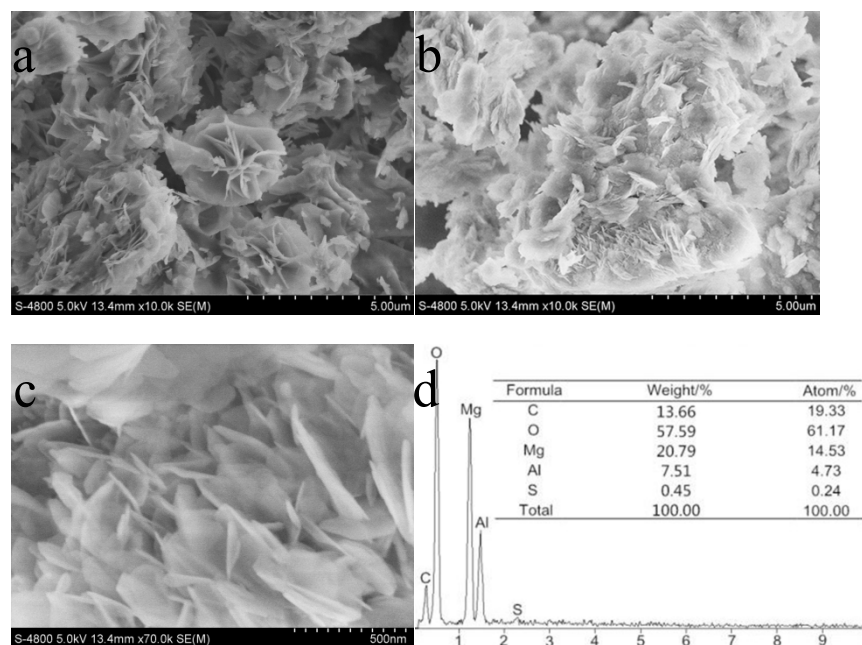

Fig.S3 (a) SEM images of LDH (b) SEM images of S/LDH-823 (c) Enlarged SEM images of S/LDH-823 (d) SEM-EDS spectrum of S/LDH-823

**Table S1** The properties of probes used for IGC Measurements

| Probe     | Character   | $a \times 10^{20} / \text{m}^2$ | $\gamma_l^d / \text{mJ} \cdot \text{m}^{-2}$ | AN* / $\text{KJ} \cdot \text{mol}^{-1}$ | DN / $\text{KJ} \cdot \text{mol}^{-1}$ | $2aN(\gamma_l^d)^{0.5}$ |
|-----------|-------------|---------------------------------|----------------------------------------------|-----------------------------------------|----------------------------------------|-------------------------|
| n-hexane  | apolar      | 0.515                           | 18.4                                         | --                                      | --                                     | 2.6598                  |
| n-heptane | apolar      | 0.570                           | 20.3                                         | --                                      | --                                     | 3.0921                  |
| n-octane  | apolar      | 0.630                           | 21.3                                         | --                                      | --                                     | 3.4896                  |
| n-nonane  | apolar      | 0.690                           | 22.7                                         | --                                      | --                                     | 3.9581                  |
| DCM       | acidic      | 0.315                           | 27.6                                         | 16.32                                   | 0.00                                   | 1.9925                  |
| TCM       | acidic      | 0.440                           | 25.9                                         | 22.60                                   | 0.00                                   | 2.6960                  |
| DEE       | amphoterich | 0.470                           | 47.0                                         | 5.86                                    | 80.37                                  | 2.1916                  |
| THF       | basic       | 0.450                           | 22.5                                         | 2.09                                    | 83.72                                  | 2.5700                  |
| Acet      | amphoterich | 0.480                           | 19.6                                         | 6.28                                    | 71.58                                  | 2.5586                  |

\*DCM-Dichloromethane; TCM-Chloroform; THF-Tetrahydrofuran; DEE-Diethylether; Acet-Ethylacetate.

\*The corresponding donor and corrected acceptor numbers were taken from reference [1].

[1] F. L. Riddle and F. M. Fowkes, *J. Am. Chem. Soc.*, 1990, 112, 3259-3264.

**LDH catalyst****Table S2** The retention time,  $V_n$ , and  $RT \ln V_n$  of LDH catalyst at various temperatures

| Temperature        | Probe                | Retention time/min | $V_n$    | $RT \ln V_n$ |
|--------------------|----------------------|--------------------|----------|--------------|
| 333.15 K           | n-hexane             | 0.076              | 0.1017   | -6.3318      |
|                    | n-heptane            | 0.324              | 0.4334   | -2.3155      |
|                    | n-octane             | 1.096              | 1.4662   | 1.0600       |
|                    | n-nonane             | 4.082              | 5.4609   | 4.7020       |
|                    | Dichloromethane(DCM) | 0.020              | 0.0268   | -10.0295     |
|                    | Chloroform(TCM)      | 0.135              | 0.1806   | -4.7404      |
|                    | Diethylether(DEE)    | 0.012              | 0.0160   | -11.4444     |
|                    | Tetrahydrofuran(THF) | 0.045              | 0.0602   | -7.7834      |
| Ethylacetate(Acet) | 0.057                | 0.0762             | -7.1286  |              |
| 343.15 K           | n-hexane             | 0.056              | 0.0772   | -7.3087      |
|                    | n-heptane            | 0.193              | 0.2659   | -3.7786      |
|                    | n-octane             | 0.610              | 0.8405   | -0.4956      |
|                    | n-nonane             | 2.498              | 3.4421   | 3.5265       |
|                    | DCM                  | 0.014              | 0.0193   | -11.2637     |
|                    | TCM                  | 0.086              | 0.1185   | -6.0848      |
|                    | DEE                  | 0.008              | 0.0110   | -12.8603     |
|                    | THF                  | 0.030              | 0.0413   | -9.0894      |
| Acet               | 0.038                | 0.0524             | -8.4150  |              |
| 353.15 K           | n-hexane             | 0.037              | 0.0525   | -8.6542      |
|                    | n-heptane            | 0.140              | 0.1985   | -4.7470      |
|                    | n-octane             | 0.451              | 0.6396   | -1.3123      |
|                    | n-nonane             | 1.369              | 1.9414   | 1.9478       |
|                    | DCM                  | 0.010              | 0.0142   | -12.4956     |
|                    | TCM                  | 0.055              | 0.0780   | -7.4902      |
|                    | DEE                  | 0.006              | 0.0085   | -13.9954     |
|                    | THF                  | 0.021              | 0.0298   | -10.3172     |
| Acet               | 0.026                | 0.0369             | -9.6901  |              |
| 363.15 K           | n-hexane             | 0.023              | 0.0335   | -10.2503     |
|                    | n-heptane            | 0.091              | 0.1327   | -6.0978      |
|                    | n-octane             | 0.275              | 0.4010   | -2.7588      |
|                    | n-nonane             | 0.674              | 0.9829   | -0.0522      |
|                    | DCM                  | 0.007              | 0.0102   | -13.8420     |
|                    | TCM                  | 0.033              | 0.0481   | -9.1604      |
|                    | DEE                  | 0.004              | 0.0058   | -15.5316     |
|                    | THF                  | 0.014              | 0.0204   | -11.7492     |
| Acet               | 0.017                | 0.0248             | -11.1630 |              |

333.15 K  $y=8.4914x-28.7420$   $R^2=0.9974$ 343.15 K  $y=8.3401x-29.5357$   $R^2=0.9998$ 353.15 K  $y=8.1975x-30.2423$   $R^2=0.9942$ 363.15 K  $y=7.8847x-30.8084$   $R^2=0.9801$ **Table S3**  $\gamma_s^d$  values of LDH catalyst versus temperature

|                 | $\gamma_s^d / \text{mJ}\cdot\text{m}^{-2}$ |          |          |          |
|-----------------|--------------------------------------------|----------|----------|----------|
| Temperature / K | 333.15 K                                   | 343.15 K | 353.15 K | 363.15 K |
| LDH             | 72.10                                      | 69.56    | 67.20    | 62.17    |

**Table S4** Adsorption free energy and adsorption enthalpy of polar probes on the surface of LDH catalyst

| Temperature / K                 | $-\Delta G^{SP} / \text{KJ}\cdot\text{mol}^{-1}$ |          |          |          | $-\Delta H_a^S / \text{KJ}\cdot\text{mol}^{-1}$ |
|---------------------------------|--------------------------------------------------|----------|----------|----------|-------------------------------------------------|
|                                 | 333.15 K                                         | 343.15 K | 353.15 K | 363.15 K |                                                 |
| CH <sub>2</sub> Cl <sub>2</sub> | 1.7934                                           | 1.6544   | 1.4132   | 1.2561   | 7.9726(R <sup>2</sup> =0.9895)                  |
| CHCl <sub>3</sub>               | 1.1088                                           | 0.9660   | 0.6516   | 0.3908   | 9.3247(R <sup>2</sup> =0.9744)                  |
| Diethyl ether                   | -1.3122                                          | -1.6028  | -1.7187  | -2.0033  | 2.9666(R <sup>2</sup> =0.9420)                  |
| THF                             | -0.8643                                          | -0.9878  | -1.1425  | -1.2045  | 3.0660(R <sup>2</sup> =0.9391)                  |
| Ethyl acetate                   | -0.1127                                          | -0.2183  | -0.4219  | -0.5284  | 4.7289(R <sup>2</sup> =0.9697)                  |

$$y=0.0255x+0.4955(R^2=0.9270)$$

$$K_a=0.0255$$

$$K_b=0.4955$$

$$K_a+K_b=0.5210$$

$$K_a/K_b=0.0515$$

S/LDH-673 catalyst

**Table S5** The retention time,  $V_n$ , and  $RT\ln V_n$  of S/LDH-673 catalyst at various temperatures

| Temperature | Probe     | Retention time/min | $V_n$  | $RT\ln V_n$ |
|-------------|-----------|--------------------|--------|-------------|
| 333.15 K    | n-hexane  | 0.079              | 0.1516 | -5.2246     |
|             | n-heptane | 0.234              | 0.6622 | -1.1417     |
|             | n-octane  | 1.100              | 2.1114 | 2.0700      |
|             | n-nonane  | 3.747              | 7.1921 | 5.4648      |
|             | DCM       | 0.097              | 0.1862 | -4.6561     |
|             | TCM       | 0.316              | 0.6065 | -1.3849     |
|             | DEE       | 0.030              | 0.0576 | -7.9065     |
|             | THF       | 0.138              | 0.2649 | -3.6796     |
|             | Acet      | 0.158              | 0.3033 | -3.3048     |
| 343.15 K    | n-hexane  | 0.056              | 0.1107 | -6.2788     |
|             | n-heptane | 0.286              | 0.4626 | -3.1991     |
|             | n-octane  | 0.752              | 1.4334 | 1.0271      |
|             | n-nonane  | 2.219              | 4.3870 | 4.2185      |
|             | DCM       | 0.059              | 0.1166 | -6.1299     |
|             | TCM       | 0.174              | 0.3440 | -3.0444     |
|             | DEE       | 0.020              | 0.0395 | -9.2162     |
|             | THF       | 0.090              | 0.1779 | -4.9252     |
|             | Acet      | 0.092              | 0.1819 | -4.8625     |
| 353.15 K    | n-hexane  | 0.042              | 0.0854 | -7.2221     |
|             | n-heptane | 0.154              | 0.3133 | -3.4072     |
|             | n-octane  | 0.411              | 0.8362 | -0.5251     |
|             | n-nonane  | 1.375              | 2.7976 | 3.0206      |
|             | DCM       | 0.039              | 0.0794 | -7.4396     |
|             | TCM       | 0.094              | 0.1913 | -4.8567     |
|             | DEE       | 0.013              | 0.0264 | -10.6653    |
|             | THF       | 0.057              | 0.1160 | -6.3254     |
|             | Acet      | 0.056              | 0.1139 | -6.3774     |
| 363.15 K    | n-hexane  | 0.025              | 0.0523 | -8.9086     |
|             | n-heptane | 0.083              | 0.1736 | -5.2856     |
|             | n-octane  | 0.241              | 0.5042 | -2.0673     |
|             | n-nonane  | 0.675              | 1.4123 | 1.0423      |
|             | DCM       | 0.020              | 0.0418 | -9.5823     |
|             | TCM       | 0.041              | 0.0858 | -7.4150     |
|             | DEE       | 0.007              | 0.1465 | -12.7520    |
|             | THF       | 0.030              | 0.0628 | -8.3581     |
|             | Acet      | 0.029              | 0.0607 | -8.4605     |

333.15 K  $y=8.2105x-26.8018$   $R^2=0.9941$ 343.15 K  $y=8.0765x-27.4596$   $R^2=0.9914$ 353.15 K  $y=7.8291x-27.8688$   $R^2=0.9972$ 363.15 K  $y=7.6938x-29.1935$   $R^2=0.9953$ **Table S6**  $\gamma_s^d$  values of S/LDH-673 catalyst versus temperature $\gamma_s^d / \text{mJ}\cdot\text{m}^{-2}$

|                 |          |          |          |          |
|-----------------|----------|----------|----------|----------|
| Temperature / K | 333.15 K | 343.15 K | 353.15 K | 363.15 K |
| LDH             | 67.41    | 65.23    | 61.29    | 59.19    |

**Table S7** Adsorption free energy and adsorption enthalpy of polar probes on the surface of S/LDH-673 catalyst

| Temperature / K                 | $-\Delta G^{SP} / \text{KJ}\cdot\text{mol}^{-1}$ |          |          |          | $-\Delta H_a^S / \text{KJ}\cdot\text{mol}^{-1}$ |
|---------------------------------|--------------------------------------------------|----------|----------|----------|-------------------------------------------------|
|                                 | 333.15 K                                         | 343.15 K | 353.15 K | 363.15 K |                                                 |
| CH <sub>2</sub> Cl <sub>2</sub> | 5.7862                                           | 5.2373   | 4.8297   | 4.2813   | 22.1723 (R <sup>2</sup> =0.9971)                |
| CHCl <sub>3</sub>               | 3.2814                                           | 2.6410   | 1.9048   | 0.0054   | 28.1398 (R <sup>2</sup> =0.9941)                |
| Diethyl ether                   | 0.9012                                           | 0.5429   | 0.0452   | -0.4202  | 15.7577 (R <sup>2</sup> =0.9935)                |
| THF                             | 2.0212                                           | 1.7778   | 1.4226   | 1.0623   | 12.7755 (R <sup>2</sup> =0.9910)                |
| Ethyl acetate                   | 2.4896                                           | 1.9326   | 1.4599   | 1.0476   | 18.4971 (R <sup>2</sup> =0.9944)                |

$$y=0.1195x+1.3123(0.9871)$$

$$K_a=0.1195$$

$$K_b=1.3123$$

$$K_a+K_b=1.4318$$

$$K_a/K_b=0.0911$$

### S/LDH-723 catalyst

**Table S8** The retention time,  $V_n$ , and  $RT\ln V_n$  of S/LDH-723 catalyst at various temperatures

| Temperature | Probe     | Retention time/min | $V_n$  | $RT \ln V_n$ |
|-------------|-----------|--------------------|--------|--------------|
| 333.15 K    | n-hexane  | 0.107              | 0.2054 | -4.3843      |
|             | n-heptane | 0.301              | 0.5777 | -1.5196      |
|             | n-octane  | 0.819              | 1.5720 | 1.2529       |
|             | n-nonane  | 2.864              | 5.4627 | 4.7030       |
|             | DCM       | 0.203              | 0.3896 | -2.6106      |
|             | TCM       | 0.583              | 1.1190 | 0.3115       |
|             | DEE       | 0.060              | 0.1152 | -5.9866      |
|             | THF       | 0.219              | 0.4204 | -2.4005      |
|             | Acet      | 0.274              | 0.5259 | -1.7799      |
| 343.15 K    | n-hexane  | 0.090              | 0.1779 | -4.9252      |
|             | n-heptane | 0.239              | 0.4725 | -2.1388      |
|             | n-octane  | 0.618              | 1.2218 | 0.5716       |
|             | n-nonane  | 2.044              | 4.0411 | 3.9842       |
|             | DCM       | 0.137              | 0.2708 | -3.7264      |
|             | TCM       | 0.403              | 0.7968 | -0.6482      |
|             | DEE       | 0.042              | 0.0830 | -7.0995      |
|             | THF       | 0.143              | 0.2827 | -3.6042      |
|             | Acet      | 0.169              | 0.3341 | -3.1276      |
| 353.15 K    | n-hexane  | 0.067              | 0.1363 | -5.8508      |
|             | n-heptane | 0.164              | 0.3337 | -3.2225      |
|             | n-octane  | 0.425              | 0.8647 | -0.4267      |
|             | n-nonane  | 1.225              | 2.4924 | 2.6814       |
|             | DCM       | 0.089              | 0.1811 | -5.0172      |
|             | TCM       | 0.257              | 0.5229 | -1.9036      |
|             | DEE       | 0.029              | 0.0590 | -8.3095      |
|             | THF       | 0.094              | 0.1913 | -4.8567      |
|             | Acet      | 0.105              | 0.2136 | -4.5318      |
| 363.15 K    | n-hexane  | 0.053              | 0.1109 | -6.6399      |
|             | n-heptane | 0.126              | 0.2636 | -4.0253      |
|             | n-octane  | 0.280              | 0.5858 | -1.6144      |
|             | n-nonane  | 0.842              | 1.7617 | 1.7097       |
|             | DCM       | 0.059              | 0.1234 | -6.3161      |
|             | TCM       | 0.167              | 0.3494 | -3.1748      |
|             | DEE       | 0.019              | 0.0398 | -9.7372      |
|             | THF       | 0.066              | 0.1381 | -5.9776      |
|             | Acet      | 0.067              | 0.1402 | -5.9322      |

333.15 K  $y=7.0005x-23.0881$   $R^2=0.9991$

343.15 K  $y=6.8623x-23.2720$   $R^2=0.9988$

353.15 K  $y=6.6138x-23.5294$   $R^2=0.9989$

363.15 K  $y=6.4045x-23.7767$   $R^2=0.9974$

**Table S9**  $\gamma_s^d$  values of S/LDH-723 catalyst versus temperature

| Temperature / K | $\gamma_s^d / \text{mJ} \cdot \text{m}^{-2}$ |          |          |         |
|-----------------|----------------------------------------------|----------|----------|---------|
|                 | 333.15 K                                     | 343.15 K | 353.15 K | 363.15K |

|           |       |       |       |       |
|-----------|-------|-------|-------|-------|
| S/LDH-450 | 49.01 | 47.09 | 43.74 | 41.02 |
|-----------|-------|-------|-------|-------|

**Table S10** Adsorption free energy and adsorption enthalpy of polar probes on the surface of S/LDH-723 catalyst

| Temperature / K                 | $-\Delta G^{SP} / \text{KJ}\cdot\text{mol}^{-1}$ |          |          |          | $-\Delta H_a^S / \text{KJ}\cdot\text{mol}^{-1}$ |
|---------------------------------|--------------------------------------------------|----------|----------|----------|-------------------------------------------------|
|                                 | 333.15 K                                         | 343.15 K | 353.15 K | 363.15 K |                                                 |
| CH <sub>2</sub> Cl <sub>2</sub> | 6.5290                                           | 5.8725   | 5.3342   | 4.6996   | 26.6000 (R <sup>2</sup> =0.9987)                |
| CHCl <sub>3</sub>               | 4.8572                                           | 4.1159   | 3.1597   | 2.4121   | 32.4984 (R <sup>2</sup> =0.9969)                |
| Diethyl ether                   | 1.7592                                           | 1.1331   | 0.7251   | 0.0034   | 20.6286 (R <sup>2</sup> =0.9865)                |
| THF                             | 2.6963                                           | 2.0317   | 1.6752   | 1.3395   | 17.4809 (R <sup>2</sup> =0.9630)                |
| Ethyl acetate                   | 3.3967                                           | 2.5865   | 2.0755   | 1.4579   | 24.4871 (R <sup>2</sup> =0.9891)                |

$$y=0.1696x+1.5590(0.9864)$$

$$K_a=0.1696$$

$$K_b=1.5590$$

$$K_a+K_b=1.7286$$

$$K_a/K_b=0.1088$$

### S/LDH-773 catalyst

**Table S11** The retention time,  $V_n$ , and  $RT\ln V_n$  of S/LDH-773 catalyst at various temperatures

| Temperature | Probe | Retention time/min | $V_n$ | $RT\ln V_n$ |
|-------------|-------|--------------------|-------|-------------|
|-------------|-------|--------------------|-------|-------------|



|          |           |       |         |          |
|----------|-----------|-------|---------|----------|
| 333.15 K | n-hexane  | 0.084 | 0.1472  | -5.3071  |
|          | n-heptane | 0.234 | 0.4100  | -2.4694  |
|          | n-octane  | 0.609 | 1.0671  | 0.1799   |
|          | n-nonane  | 1.575 | 2.7598  | 2.8118   |
|          | DCM       | 0.291 | 0.5099  | -1.8656  |
|          | TCM       | 0.684 | 1.1985  | 0.5016   |
|          | DEE       | 0.090 | 0.1577  | -5.1160  |
|          | THF       | 0.317 | 0.5555  | -1.6286  |
| 343.15 K | Acet      | 0.429 | 0.7517  | -0.7905  |
|          | n-hexane  | 0.059 | 0.1065  | -6.3899  |
|          | n-heptane | 0.150 | 0.2707  | -3.7278  |
|          | n-octane  | 0.359 | 0.6479  | -1.2381  |
|          | n-nonane  | 0.938 | 1.6929  | 1.5020   |
|          | DCM       | 0.163 | 0.2942  | -3.4907  |
|          | TCM       | 0.298 | 0.5378  | -1.7694  |
|          | DEE       | 0.050 | 0.0902  | -6.8621  |
| 353.15 K | THF       | 0.169 | 0.3050  | -3.3876  |
|          | Acet      | 0.191 | 0.3447  | -3.0384  |
|          | n-hexane  | 0.043 | 0.07987 | -7.4206  |
|          | n-heptane | 0.100 | 0.1857  | -4.9426  |
|          | n-octane  | 0.242 | 0.4495  | -2.3478  |
|          | n-nonane  | 0.567 | 1.0532  | 0.1521   |
|          | DCM       | 0.094 | 0.1746  | -5.1243  |
|          | TCM       | 0.150 | 0.2786  | -3.7521  |
| 363.15 K | DEE       | 0.028 | 0.0520  | -8.6801  |
|          | THF       | 0.090 | 0.1672  | -5.2520  |
|          | Acet      | 0.101 | 0.1876  | -4.9134  |
|          | n-hexane  | 0.039 | 0.0745  | -7.8412  |
|          | n-heptane | 0.084 | 0.1604  | -5.5247  |
|          | n-octane  | 0.192 | 0.3667  | -3.0287  |
|          | n-nonane  | 0.450 | 0.8595  | -0.4571  |
|          | DCM       | 0.068 | 0.1299  | -6.1627  |
| 363.15 K | TCM       | 0.091 | 0.1738  | -5.2830  |
|          | DEE       | 0.019 | 0.0363  | -10.0124 |
|          | THF       | 0.062 | 0.1184  | -6.4416  |
|          | Acet      | 0.064 | 0.1222  | -6.3457  |

333.15 K  $y=6.2845x-21.9344$   $R^2=0.9976$

343.15 K  $y=6.0931x-22.5700$   $R^2=0.9997$

353.15 K  $y=5.8905x-23.0777$   $R^2=0.9979$

363.15 K  $y=5.7387x-23.1500$   $R^2=0.9987$

**Table S12**  $\gamma_s^d$  values of S/LDH-773 catalyst versus temperature

|                 | $\gamma_s^d / \text{mJ} \cdot \text{m}^{-2}$ |          |          |          |
|-----------------|----------------------------------------------|----------|----------|----------|
| Temperature / K | 333.15 K                                     | 343.15 K | 353.15 K | 363.15 K |
| S/LDH-450       | 39.49                                        | 37.12    | 34.70    | 32.93    |

**Table S13** Adsorption free energy and adsorption enthalpy of polar probes on the surface of S/LDH-773 catalyst

| Temperature / K                 | $-\Delta G^{SP} / \text{KJ}\cdot\text{mol}^{-1}$ |         |         |         | $-\Delta H_a^S / \text{KJ}\cdot\text{mol}^{-1}$ |
|---------------------------------|--------------------------------------------------|---------|---------|---------|-------------------------------------------------|
|                                 | 333.15K                                          | 343.15K | 353.15K | 363.15K |                                                 |
| CH <sub>2</sub> Cl <sub>2</sub> | 7.5469                                           | 6.9388  | 6.2167  | 5.5529  | 29.8810 (R <sup>2</sup> =0.9990)                |
| CHCl <sub>3</sub>               | 5.4930                                           | 4.3736  | 3.4448  | 2.3955  | 39.5418 (R <sup>2</sup> =0.9986)                |
| Diethyl ether                   | 3.0453                                           | 2.3543  | 1.4880  | 0.5607  | 30.7334 (R <sup>2</sup> =0.9943)                |
| THF                             | 4.1546                                           | 3.5231  | 2.6871  | 1.9599  | 28.8744 (R <sup>2</sup> =0.9968)                |
| Ethyl acetate                   | 5.0644                                           | 3.9418  | 3.0929  | 2.1213  | 37.3122 (R <sup>2</sup> =0.9964)                |

$$y=0.3107x+1.7619(0.9869)$$

$$K_a=0.3107$$

$$K_b=1.7619$$

$$K_a+K_b=2.0726$$

$$K_a/K_b=0.1734$$

**S/LDH-823 catalyst****Table S14** The retention time,  $V_n$ , and  $RT\ln V_n$  of S/LDH-823 catalyst at various temperatures

| Temperature | Probe    | Retention time/min | $V_n$  | $RT\ln V_n$ |
|-------------|----------|--------------------|--------|-------------|
| 333.15 K    | n-hexane | 0.100              | 0.1841 | -4.6870     |

|          |           |       |        |         |
|----------|-----------|-------|--------|---------|
|          | n-heptane | 0.250 | 0.4603 | -2.1490 |
|          | n-octane  | 0.567 | 1.0440 | 0.1191  |
|          | n-nonane  | 1.389 | 2.5574 | 2.6008  |
|          | DCM       | 0.615 | 1.1323 | 0.3442  |
|          | TCM       | 1.017 | 1.8725 | 1.7374  |
|          | DEE       | 0.229 | 0.4216 | -2.3921 |
|          | THF       | 0.524 | 0.9648 | -0.0993 |
|          | Acet      | 0.701 | 1.2907 | 0.7068  |
| 343.15 K | n-hexane  | 0.091 | 0.1726 | -5.0124 |
|          | n-heptane | 0.196 | 0.3717 | -2.8234 |
|          | n-octane  | 0.416 | 0.7889 | -0.6764 |
|          | n-nonane  | 1.000 | 1.8964 | 1.8258  |
|          | DCM       | 0.450 | 0.8534 | -0.4523 |
|          | TCM       | 0.585 | 1.1094 | 0.2962  |
|          | DEE       | 0.152 | 0.2883 | -3.5488 |
|          | THF       | 0.318 | 0.6031 | -1.4428 |
|          | Acet      | 0.384 | 0.7282 | -0.9048 |
| 353.15 K | n-hexane  | 0.076 | 0.1483 | -5.6030 |
|          | n-heptane | 0.143 | 0.2791 | -3.7470 |
|          | n-octane  | 0.286 | 0.5582 | -1.7119 |
|          | n-nonane  | 0.618 | 1.2062 | 0.5503  |
|          | DCM       | 0.309 | 0.6031 | -1.4848 |
|          | TCM       | 0.321 | 0.6265 | -1.3729 |
|          | DEE       | 0.098 | 0.1913 | -4.8565 |
|          | THF       | 0.190 | 0.3708 | -2.9127 |
|          | Acet      | 0.210 | 0.4099 | -2.6188 |
| 363.15 K | n-hexane  | 0.068 | 0.1365 | -6.0131 |
|          | n-heptane | 0.118 | 0.2368 | -4.3490 |
|          | n-octane  | 0.207 | 0.4154 | -2.6521 |
|          | n-nonane  | 0.422 | 0.8470 | -0.5016 |
|          | DCM       | 0.230 | 0.4616 | -2.3340 |
|          | TCM       | 0.192 | 0.3853 | -2.8792 |
|          | DEE       | 0.067 | 0.1345 | -6.0579 |
|          | THF       | 0.123 | 0.2469 | -4.2237 |
|          | Acet      | 0.131 | 0.2629 | -4.0335 |

333.15 K  $y=5.6187x-19.5702$   $R^2=0.9991$

343.15 K  $y=5.2797x-19.0942$   $R^2=0.9997$

353.15 K  $y=4.7744x-18.3829$   $R^2=0.9983$

363.15 K  $y=4.2505x-17.4051$   $R^2=0.9975$

**Table S15**  $\gamma_s^d$  values of S/LDH-823 catalyst versus temperature

| Temperature / K | $\gamma_s^d / \text{mJ} \cdot \text{m}^{-2}$ |          |          |          |
|-----------------|----------------------------------------------|----------|----------|----------|
|                 | 333.15 K                                     | 343.15 K | 353.15 K | 363.15 K |
| S/LDH-450       | 31.57                                        | 27.88    | 22.79    | 18.07    |

**Table S16** Adsorption free energy and adsorption enthalpy of polar probes on the surface of S/LDH-823 catalyst

| Temperature / K                 | $-\Delta G^{SP} / \text{KJ}\cdot\text{mol}^{-1}$ |         |         |         | $-\Delta H_a^S / \text{KJ}\cdot\text{mol}^{-1}$ |
|---------------------------------|--------------------------------------------------|---------|---------|---------|-------------------------------------------------|
|                                 | 333.15K                                          | 343.15K | 353.15K | 363.15K |                                                 |
| CH <sub>2</sub> Cl <sub>2</sub> | 8.7191                                           | 8.1221  | 7.3851  | 6.6020  | 32.3101 (R <sup>2</sup> =0.9968)                |
| CHCl <sub>3</sub>               | 6.1596                                           | 5.1563  | 4.1382  | 3.0666  | 40.4524 (R <sup>2</sup> =0.9997)                |
| Diethyl ether                   | 4.8601                                           | 3.9744  | 3.0628  | 2.0318  | 36.1386 (R <sup>2</sup> =0.9984)                |
| THF                             | 5.0308                                           | 4.0826  | 3.2000  | 2.2576  | 35.6832 (R <sup>2</sup> =0.9998)                |
| Ethyl acetate                   | 5.9010                                           | 4.6808  | 3.5483  | 2.4963  | 37.7271 (R <sup>2</sup> =0.9987)                |

$$y=0.3774x+1.8747(0.9877)$$

$$K_a=0.3774$$

$$K_b=1.8747$$

$$K_a+K_b=2.2521$$

$$K_a/K_b=0.2013$$

**S/LDH-873 catalyst****Table S17** The retention time,  $V_n$ , and  $RT\ln V_n$  of S/LDH-873 catalyst at various temperatures

| Temperature | Probe     | Retention time/min | $V_n$  | $RT\ln V_n$ |
|-------------|-----------|--------------------|--------|-------------|
| 333.15 K    | n-hexane  | 0.153              | 0.2611 | -3.7193     |
|             | n-heptane | 0.391              | 0.6673 | -1.1205     |

|          |           |       |        |         |
|----------|-----------|-------|--------|---------|
|          | n-octane  | 0.875 | 1.4933 | 1.1106  |
|          | n-nonane  | 1.957 | 3.3398 | 3.3402  |
|          | DCM       | 0.819 | 1.3977 | 0.9274  |
|          | TCM       | 1.442 | 2.4609 | 2.4943  |
|          | DEE       | 0.225 | 0.3840 | -2.6511 |
|          | THF       | 0.712 | 1.2151 | 0.5396  |
|          | Acet      | 0.917 | 1.5650 | 1.2405  |
| 343.15 K | n-hexane  | 0.094 | 0.1652 | -5.1364 |
|          | n-heptane | 0.224 | 0.3938 | -2.6590 |
|          | n-octane  | 0.444 | 0.7805 | -0.7071 |
|          | n-nonane  | 0.908 | 1.5961 | 1.3340  |
|          | DCM       | 0.463 | 0.8139 | -0.5876 |
|          | TCM       | 0.568 | 0.9984 | -0.0044 |
|          | DEE       | 0.115 | 0.2022 | -4.5611 |
|          | THF       | 0.315 | 0.5537 | -1.6864 |
|          | Acet      | 0.381 | 0.6697 | -1.1437 |
| 353.15 K | n-hexane  | 0.052 | 0.0941 | -6.9400 |
|          | n-heptane | 0.113 | 0.2044 | -4.6612 |
|          | n-octane  | 0.225 | 0.4070 | -2.6391 |
|          | n-nonane  | 0.410 | 0.7417 | -0.8773 |
|          | DCM       | 0.189 | 0.3419 | -3.1510 |
|          | TCM       | 0.212 | 0.3835 | -2.8138 |
|          | DEE       | 0.047 | 0.0850 | -7.2369 |
|          | THF       | 0.129 | 0.2334 | -4.2724 |
|          | Acet      | 0.138 | 0.2496 | -4.0744 |
| 363.15 K | n-hexane  | 0.030 | 0.0558 | -8.7130 |
|          | n-heptane | 0.055 | 0.1023 | -6.8829 |
|          | n-octane  | 0.095 | 0.1767 | -5.2328 |
|          | n-nonane  | 0.175 | 0.3256 | -3.3883 |
|          | DCM       | 0.095 | 0.1767 | -5.2328 |
|          | TCM       | 0.081 | 0.1509 | -5.7141 |
|          | DEE       | 0.021 | 0.0391 | -9.7898 |
|          | THF       | 0.054 | 0.1004 | -6.9383 |
|          | Acet      | 0.055 | 0.1023 | -6.8829 |

333.15 K  $y=5.4470x-18.0717$   $R^2=0.9955$

343.15 K  $y=4.9714x-18.1973$   $R^2=0.9938$

353.15 K  $y=4.6987x-19.2848$   $R^2=0.9904$

363.15 K  $y=4.1042x-19.5978$   $R^2=0.9996$

**Table S18**  $\gamma_s^d$  values of S/LDH-873 catalyst versus temperature

|                 | $\gamma_s^d / \text{mJ}\cdot\text{m}^{-2}$ |          |          |          |
|-----------------|--------------------------------------------|----------|----------|----------|
| Temperature / K | 333.15 K                                   | 343.15 K | 353.15 K | 363.15 K |
| S/LDH-450       | 29.67                                      | 24.71    | 22.08    | 16.84    |

**Table S19** Adsorption free energy and adsorption enthalpy of polar probes on the surface of S/LDH-873 catalyst

| Temperature / K                 | $-\Delta G^{SP} / \text{KJ}\cdot\text{mol}^{-1}$ |         |         |         | $-\Delta H_a^S / \text{KJ}\cdot\text{mol}^{-1}$ |
|---------------------------------|--------------------------------------------------|---------|---------|---------|-------------------------------------------------|
|                                 | 333.15K                                          | 343.15K | 353.15K | 363.15K |                                                 |
| CH <sub>2</sub> Cl <sub>2</sub> | 8.1460                                           | 7.7042  | 6.7716  | 6.1874  | 30.8445 (R <sup>2</sup> =0.9844)                |
| CHCl <sub>3</sub>               | 5.8809                                           | 4.7900  | 3.8033  | 2.8188  | 39.7836 (R <sup>2</sup> =0.9992)                |
| Diethyl ether                   | 3.4830                                           | 2.7409  | 1.7502  | 0.8132  | 33.4512 (R <sup>2</sup> =0.9953)                |
| THF                             | 4.6125                                           | 3.7344  | 2.9367  | 2.1117  | 32.2674 (R <sup>2</sup> =0.9995)                |
| Ethyl acetate                   | 5.3755                                           | 4.3338  | 3.1883  | 2.2139  | 40.8128 (R <sup>2</sup> =0.9990)                |

$$y=0.3381x+1.8519(0.9865)$$

$$K_a=0.3381$$

$$K_b=1.8519$$

$$K_a+K_b=2.1900$$

$$K_a/K_b=0.1826$$

### LDH-823 catalyst

**Table S20** The retention time,  $V_n$ , and  $RT\ln V_n$  of LDH-823 catalyst at various temperatures

| Temperature | Probe     | Retention time/min | $V_n$  | $RT\ln V_n$ |
|-------------|-----------|--------------------|--------|-------------|
| 333.15 K    | n-hexane  | 0.147              | 0.2604 | -3.7262     |
|             | n-heptane | 0.428              | 0.7583 | -0.7662     |
|             | n-octane  | 1.025              | 1.8161 | 1.6528      |

|          |           |       |         |          |
|----------|-----------|-------|---------|----------|
|          | n-nonane  | 3.077 | 5.4519  | 4.6975   |
|          | DCM       | 0.951 | 1.6850  | 1.4452   |
|          | TCM       | 1.612 | 2.8562  | 2.9069   |
|          | DEE       | 0.043 | 0.0762  | -7.1310  |
|          | THF       | 0.154 | 0.2729  | -3.5974  |
|          | Acet      | 0.190 | 0.3366  | -3.0156  |
| 343.15 K | n-hexane  | 0.090 | 0.1642  | -5.1534  |
|          | n-heptane | 0.228 | 0.4161  | -2.5015  |
|          | n-octane  | 0.556 | 1.0147  | 0.0416   |
|          | n-nonane  | 1.478 | 2.6974  | 2.8309   |
|          | DCM       | 0.470 | 0.8578  | -0.4378  |
|          | TCM       | 0.794 | 1.4490  | 1.0582   |
|          | DEE       | 0.024 | 0.0438  | -8.9244  |
|          | THF       | 0.090 | 0.1642  | -5.1534  |
|          | Acet      | 0.097 | 0.1770  | -4.9398  |
| 353.15 K | n-hexane  | 0.054 | 0.1014  | -6.7191  |
|          | n-heptane | 0.124 | 0.2329  | -4.2784  |
|          | n-octane  | 0.274 | 0.5146  | -1.9505  |
|          | n-nonane  | 0.717 | 1.3467  | 0.8739   |
|          | DCM       | 0.217 | 0.4076  | -2.6353  |
|          | TCM       | 0.268 | 0.5034  | -2.0155  |
|          | DEE       | 0.012 | 0.02254 | -11.4352 |
|          | THF       | 0.048 | 0.0902  | -7.0649  |
|          | Acet      | 0.050 | 0.0939  | -6.9451  |
| 363.15 K | n-hexane  | 0.035 | 0.0676  | -8.1343  |
|          | n-heptane | 0.076 | 0.1468  | -5.7933  |
|          | n-octane  | 0.162 | 0.3129  | -3.5081  |
|          | n-nonane  | 0.379 | 0.7320  | -0.9420  |
|          | DCM       | 0.099 | 0.1912  | -4.9950  |
|          | TCM       | 0.102 | 0.1970  | -4.9049  |
|          | DEE       | 0.008 | 0.0154  | -12.5904 |
|          | THF       | 0.029 | 0.0560  | -8.7021  |
|          | Acet      | 0.027 | 0.0521  | -8.9178  |

333.15 K  $y=6.4523x-20.8274$   $R^2=0.9993$

343.15 K  $y=6.1702x-21.5567$   $R^2=0.9997$

353.15 K  $y=5.8508x-22.3255$   $R^2=0.9996$

363.15 K  $y=5.5579x-22.9351$   $R^2=0.9998$

**Table S21**  $\gamma_s^d$  values of LDH-823 catalyst versus temperature

|                 | $\gamma_s^d / \text{mJ}\cdot\text{m}^{-2}$ |          |          |          |
|-----------------|--------------------------------------------|----------|----------|----------|
| Temperature / K | 333.15 K                                   | 343.15 K | 353.15 K | 363.15 K |
| S/LDH-450       | 41.63                                      | 38.07    | 34.23    | 30.89    |

**Table S22** Adsorption free energy and adsorption enthalpy of polar probes on the surface of LDH-823 catalyst

|  | $-\Delta G^{SP} / \text{KJ}\cdot\text{mol}^{-1}$ | $-\Delta H_a^S / \text{KJ}\cdot\text{mol}^{-1}$ |
|--|--------------------------------------------------|-------------------------------------------------|
|--|--------------------------------------------------|-------------------------------------------------|

| Temperature / K                 | 333.15K | 343.15K | 353.15K | 363.15K |                                  |
|---------------------------------|---------|---------|---------|---------|----------------------------------|
| CH <sub>2</sub> Cl <sub>2</sub> | 9.4164  | 8.8248  | 8.0325  | 6.8660  | 37.4520 (R <sup>2</sup> =0.9788) |
| CHCl <sub>3</sub>               | 6.3389  | 5.9800  | 4.5362  | 3.0461  | 43.9359 (R <sup>2</sup> =0.9312) |
| Diethyl ether                   | -0.4445 | -0.8903 | -1.6323 | -1.8360 | 16.0085 (R <sup>2</sup> =0.9354) |
| THF                             | 0.6476  | 0.5459  | 0.2240  | -0.0508 | 8.6862 (R <sup>2</sup> =0.9469)  |
| Ethyl acetate                   | 1.3030  | 0.8298  | 0.4105  | -0.2031 | 17.7204 (R <sup>2</sup> =0.9650) |

$$y=0.0508x+2.1227(0.9558)$$

$$K_a=0.0508$$

$$K_b=2.1227$$

$$K_a+K_b=2.1735$$

$$K_a/K_b=0.0239$$

**Table S23**  $\gamma_s^d$  values of these catalysts versus temperature

| Temperature / K | $\gamma_s^d / \text{mJ}\cdot\text{m}^{-2}$ |          |          |          |
|-----------------|--------------------------------------------|----------|----------|----------|
|                 | 333.15 K                                   | 343.15 K | 353.15 K | 363.15 K |
| LDH             | 72.10                                      | 69.56    | 67.20    | 62.17    |
| LDH-823         | 42.06                                      | 38.07    | 34.13    | 30.95    |
| S/LDH-673       | 67.41                                      | 65.23    | 61.29    | 59.19    |
| S/LDH-723       | 49.01                                      | 47.09    | 43.74    | 41.02    |
| S/LDH-773       | 39.49                                      | 37.12    | 34.70    | 32.93    |
| S/LDH-823       | 31.57                                      | 27.88    | 22.79    | 18.07    |
| S/LDH-873       | 29.67                                      | 24.71    | 22.08    | 16.84    |
